# Supplementary material for: Theoretical studies on the AnO2n+(An = U, Np; n = 1, 2) complexes with di-(2-ethylhexyl)phosphoric acid
Source: Royal Society of Chemistry journal article supplement (doi:10.1039/c4dt03321c), 2014-12-24
Supplement: c4dt03321c1.pdf [file c4dt03321c1.pdf]

## Theoretical Studies on the $AnO_2^{n+}$ ( $An=U, Np; n=1, 2$ ) Complexes with Di-(2-ethylhexyl) Phosphoric Acid

*Juan, Luo,<sup>a‡</sup> Cong-Zhi Wang,<sup>a‡</sup> Jian-Hui Lan,<sup>a</sup> Qun-Yan Wu,<sup>a</sup> Yu-Liang Zhao,<sup>a</sup> Zhi-Fang Chai,<sup>a,b</sup> Chang-Ming Nie<sup>c</sup> and Wei-Qun Shi<sup>\*a</sup>*

<sup>a</sup>Group of Nuclear Energy Chemistry, Key Laboratory of Nuclear Radiation and Nuclear Energy Technology and Key Laboratory for Biomedical Effects of Nanomaterials and Nanosafety, Institute of High Energy Physics, Chinese Academy of Sciences, Beijing 100049, China

<sup>b</sup>School for Radiological and Interdisciplinary Sciences (RAD-X) and Collaborative Innovation Center of Radiation Medicine of Jiangsu Higher Education Institutions, Soochow University, Suzhou 215123, China

<sup>c</sup>School of Chemistry and Chemical Engineering, University of South China, Hengyang 421001, China

### Supporting Information

**Figure S1-S2.** HOMO (a), LUMO (b) of HDEHP dimer and trimer, and MEP mapped on the isodensity surface (c) for the dimer and trimer.

**Figure S3-S4** Optimized structures of  $UO_2^+$  and  $NpO_2^+$  complexes by the B3LYP method.

**Figure S5** The isomers of the  $AnO_2(HL)_2(NO_3)_2$  ( $An=U, Np$ ) complexes.

**Table S1-S2** QTAIM analysis of the bonds between ligands and metal for the  $\text{UO}_2^{2+}$ ,  $\text{NpO}_2^{2+}$ ,  $\text{UO}_2^+$  and  $\text{NpO}_2^+$  complexes.

**Table S3.** Changes of the Gibbs free energy (kcal/mol) for the complexes of  $\text{AnO}_2^{n+}$  ( $n=1, 2$ ) and L (L=DEHP<sup>-</sup>) in aqueous solution and organic Aolution obtained by the B3LYP method.

**Table S4** The bond length and the symmetrical and antisymmetrical stretching frequency ( $\nu_s$  and  $\nu_{as}$ ,  $\text{cm}^{-1}$ ) of  $\text{An}=\text{O}_{\text{axial}}$  for the 2:1-type complexes.

**Complete Gaussian 09 reference (Reference 21)**

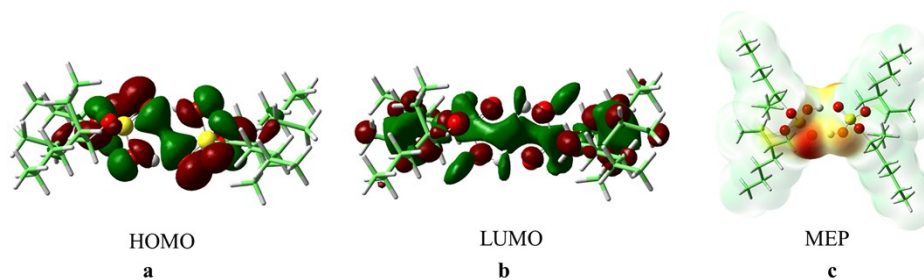

**Figure S1.** HOMO (a), LUMO (b) of HDEHP dimer, and MEP mapped on the isodensity surface (c) for the dimer; The isosurface value is set as 0.02 for MO and 0.0004 for MEP, the color range is taken from -0.0525 (the most electronegative region, red) to 0.0525 (the most electropositive region, blue).

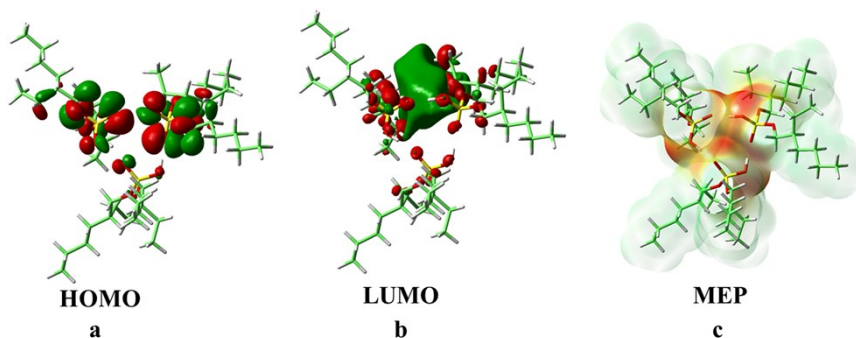

**Figure S2.** HOMO (a), LUMO (b) of HDEHP trimer, and MEP mapped on the isodensity surface (c) for the trimer; The isosurface value is set as 0.02 for MO and 0.0004 for MEP, the color range is taken from -0.0471 (the most electronegative region, red) to 0.0471 (the most electropositive region, blue).

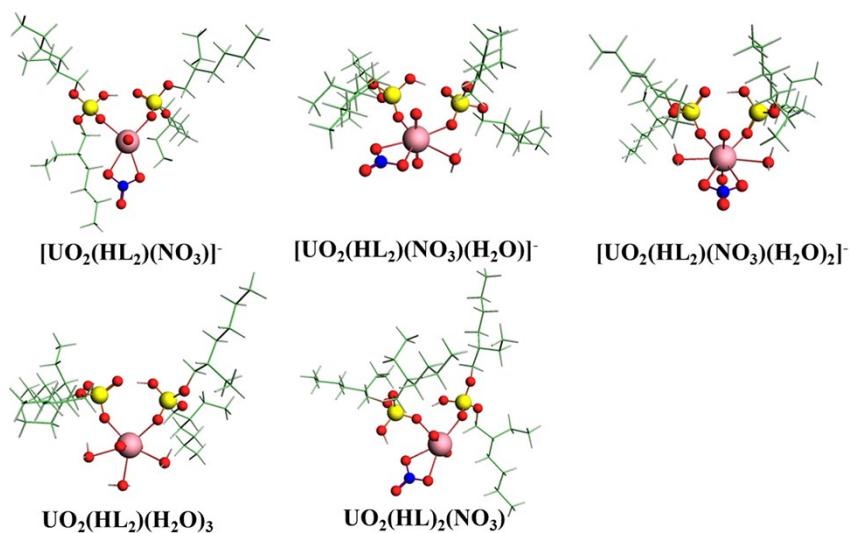

**Figure S3.** Optimized structures of  $\text{UO}_2^+$  complexes by the B3LYP method. Green and white sticks represent C and H, while yellow, red, blue, and pink spheres represent P, O, N, and U, respectively.

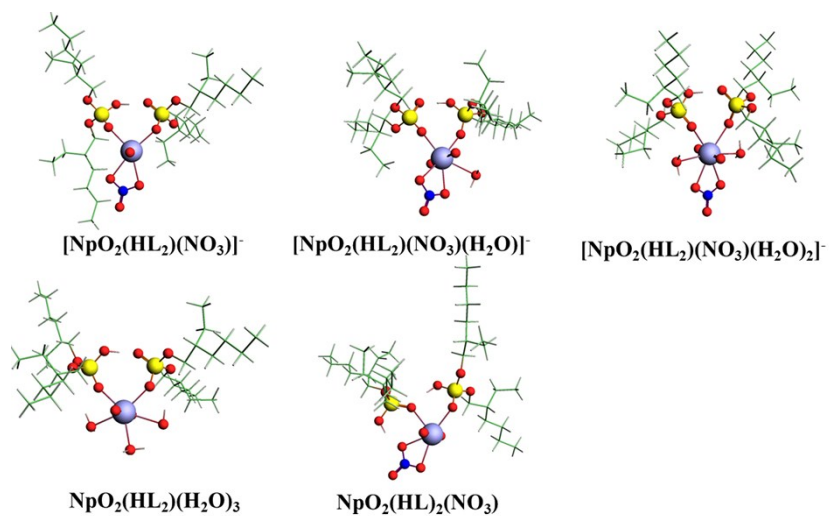

**Figure S4.** Optimized structures of  $\text{NpO}_2^+$  complexes by the B3LYP method. Green and white sticks represent C and H, while yellow, red, blue, and purple spheres represent P, O, N, and Np, respectively.

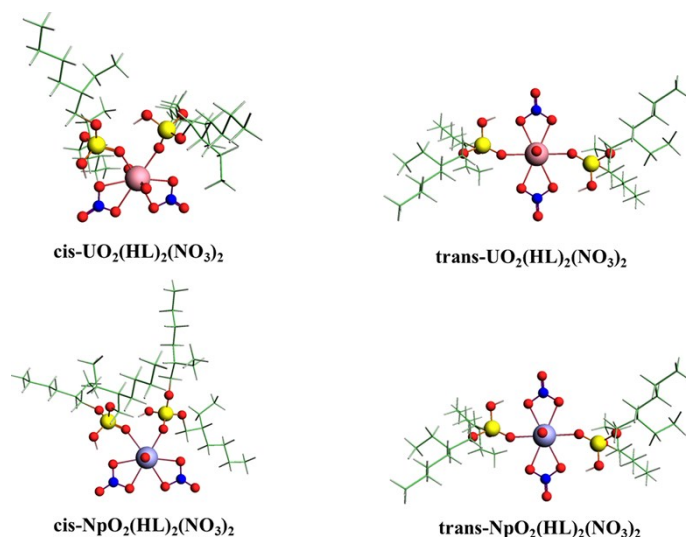

**Figure S5.** The isomers of the  $AnO_2(HL)_2(NO_3)_2$  ( $An=U, Np$ ) complexes. Green and white sticks represent C and H, while yellow, red, blue, pink, and purple spheres represent P, O, N, U, and Np, respectively.

**Table S1.** QTAIM analysis of the bonds between ligands and metal for the  $UO_2^{2+}$ ,  $NpO_2^{2+}$  complexes. The average electron density ( $\rho$ ) and laplacian ( $\nabla^2\rho$ ) values (a.u.) are presented.

| Species                     | Bonds                                      | U(VI)              |                            | Np(VI)             |                            |
|-----------------------------|--------------------------------------------|--------------------|----------------------------|--------------------|----------------------------|
|                             |                                            | $\rho \times 10^2$ | $\nabla^2\rho \times 10^2$ | $\rho \times 10^2$ | $\nabla^2\rho \times 10^2$ |
| $AnO_2(HL_2)(NO_3)$         | An-O <sub>P</sub>                          | 7.74               | 31.8                       | 7.87               | 32.9                       |
|                             | An-O <sub>NO<sub>3</sub><sup>-</sup></sub> | 5.99               | 19.9                       | 6.00               | 20.4                       |
| $AnO_2(HL_2)(NO_3)(H_2O)$   | An-O <sub>P</sub>                          | 7.49               | 31.3                       | 7.47               | 31.3                       |
|                             | An-O <sub>NO<sub>3</sub><sup>-</sup></sub> | 5.44               | 18.4                       | 5.42               | 18.8                       |
|                             | An-O <sub>H<sub>2</sub>O</sub>             | 4.24               | 16.1                       | 4.25               | 16.6                       |
|                             | An-O <sub>H<sub>2</sub>O</sub>             | 4.24               | 16.1                       | 4.25               | 16.6                       |
| $AnO_2(HL_2)(NO_3)(H_2O)_2$ | An-O <sub>P</sub>                          | 6.15               | 25.0                       | 6.11               | 24.7                       |
|                             | An-O <sub>NO<sub>3</sub><sup>-</sup></sub> | 4.73               | 15.9                       | 4.55               | 15.6                       |
|                             | An-O <sub>H<sub>2</sub>O</sub>             | 4.01               | 14.7                       | 3.85               | 14.4                       |
|                             | An-O <sub>H<sub>2</sub>O</sub>             | 4.01               | 14.7                       | 3.85               | 14.4                       |
| $[AnO_2(HL_2)(H_2O)_3]^+$   | An-O <sub>P</sub>                          | 8.15               | 31.8                       | 8.19               | 32.1                       |
|                             | An-O <sub>H<sub>2</sub>O</sub>             | 4.28               | 16.2                       | 4.27               | 16.3                       |
| $AnO_2(HL)_2(NO_3)_2$       | An-O <sub>P</sub>                          | 5.73               | 23.8                       | 5.67               | 24.1                       |
|                             | An-O <sub>NO<sub>3</sub><sup>-</sup></sub> | 4.64               | 16.0                       | 4.59               | 16.2                       |

**Table S2.** QTAIM analysis of the bonds between ligands and metal for the  $\text{UO}_2^+$ ,  $\text{NpO}_2^+$  complexes. The average electron density ( $\rho$ ) and laplacian ( $\nabla^2\rho$ ) values (a.u.) are presented.

| Species                                                            | Bonds                                      | U(V)               |                            | Np(V)              |                            |
|--------------------------------------------------------------------|--------------------------------------------|--------------------|----------------------------|--------------------|----------------------------|
|                                                                    |                                            | $\rho \times 10^2$ | $\nabla^2\rho \times 10^2$ | $\rho \times 10^2$ | $\nabla^2\rho \times 10^2$ |
| $[\text{AnO}_2(\text{HL}_2)(\text{NO}_3)]^-$                       | An-O <sub>P</sub>                          | 5.47               | 23.0                       | 5.34               | 23.6                       |
|                                                                    | An-O <sub>NO<sub>3</sub><sup>-</sup></sub> | 4.37               | 15.9                       | 4.32               | 16.2                       |
| $[\text{AnO}_2(\text{HL}_2)(\text{NO}_3)(\text{H}_2\text{O})]^-$   | An-O <sub>P</sub>                          | 4.78               | 20.1                       | 4.98               | 22.1                       |
|                                                                    | An-O <sub>NO<sub>3</sub><sup>-</sup></sub> | 4.30               | 15.7                       | 4.16               | 16.3                       |
|                                                                    | An-O <sub>H<sub>2</sub>O</sub>             | 3.26               | 11.8                       | 2.75               | 10.2                       |
| $[\text{AnO}_2(\text{HL}_2)(\text{NO}_3)(\text{H}_2\text{O})_2]^-$ | An-O <sub>P</sub>                          | 4.17               | 17.1                       | 3.56               | 15.5                       |
|                                                                    | An-O <sub>NO<sub>3</sub><sup>-</sup></sub> | 3.14               | 11.3                       | 3.73               | 14.0                       |
|                                                                    | An-O <sub>H<sub>2</sub>O</sub>             | 3.01               | 11.1                       | 3.08               | 11.7                       |
| $[\text{AnO}_2(\text{HL}_2)(\text{H}_2\text{O})_3]$                | An-O <sub>P</sub>                          | 5.28               | 22.0                       | 4.98               | 21.8                       |
|                                                                    | An-O <sub>H<sub>2</sub>O</sub>             | 3.46               | 12.8                       | 3.37               | 12.9                       |
| $\text{AnO}_2(\text{HL})_2(\text{NO}_3)$                           | An-O <sub>P</sub>                          | 4.91               | 20.3                       | 4.54               | 20.0                       |
|                                                                    | An-O <sub>NO<sub>3</sub><sup>-</sup></sub> | 4.42               | 16.4                       | 4.51               | 17.9                       |

**Table S3.** Changes of the Gibbs free energy (kcal/mol) for the complexes of  $\text{AnO}_2^{n+}$  ( $n=1, 2$ ) and L (L=DEHP<sup>-</sup>) in aqueous solution and organic Aolution obtained by the B3LYP method<sup>a</sup>.

| Reaction                                                                                                                                                                               | $\Delta G_{\text{aq}}$ | $\Delta G_{\text{org}}$ |
|----------------------------------------------------------------------------------------------------------------------------------------------------------------------------------------|------------------------|-------------------------|
| $\text{AnO}_2(\text{H}_2\text{O})_5^{2+} + (\text{HL})_2 + \text{NO}_3^- \rightarrow \text{AnO}_2(\text{HL}_2)(\text{NO}_3) + \text{H}^+ + 5\text{H}_2\text{O}$                        | -9.8/-12.4             | -17.5/-21.1             |
| $\text{AnO}_2(\text{H}_2\text{O})_5^{2+} + (\text{HL})_2 + \text{NO}_3^- \rightarrow \text{AnO}_2(\text{HL}_2)(\text{NO}_3)(\text{H}_2\text{O}) + \text{H}^+ + 4\text{H}_2\text{O}$    | -15.9/-18.5            | -23.9/-26.2             |
| $\text{AnO}_2(\text{H}_2\text{O})_5^{2+} + (\text{HL})_2 + \text{NO}_3^- \rightarrow \text{AnO}_2(\text{HL}_2)(\text{NO}_3)(\text{H}_2\text{O})_2 + \text{H}^+ + 3\text{H}_2\text{O}$  | -7.7/-9.1              | -16.8/-17.0             |
| $\text{AnO}_2(\text{H}_2\text{O})_5^{2+} + (\text{HL})_2 \rightarrow [\text{AnO}_2(\text{HL}_2)(\text{H}_2\text{O})_3]^+ + \text{H}^+ + 2\text{H}_2\text{O}$                           | -0.3/-2.0              | 8.9/7.9                 |
| $\text{AnO}_2(\text{H}_2\text{O})_5^{2+} + (\text{HL})_2 + 2\text{NO}_3^- \rightarrow \text{AnO}_2(\text{HL})_2(\text{NO}_3)_2 + 5\text{H}_2\text{O}$                                  | -26.8/-26.4            | -35.1/-35.0             |
| $\text{AnO}_2(\text{H}_2\text{O})_5^+ + (\text{HL})_2 + \text{NO}_3^- \rightarrow [\text{AnO}_2(\text{HL}_2)(\text{NO}_3)]^- + \text{H}^+ + 5\text{H}_2\text{O}$                       | 3.8/6.4                | 15.9/16.6               |
| $\text{AnO}_2(\text{H}_2\text{O})_5^+ + (\text{HL})_2 + \text{NO}_3^- \rightarrow [\text{AnO}_2(\text{HL}_2)(\text{NO}_3)(\text{H}_2\text{O})]^- + \text{H}^+ + 4\text{H}_2\text{O}$   | 2.8/13.0               | 14.4/22.3               |
| $\text{AnO}_2(\text{H}_2\text{O})_5^+ + (\text{HL})_2 + \text{NO}_3^- \rightarrow [\text{AnO}_2(\text{HL}_2)(\text{NO}_3)(\text{H}_2\text{O})_2]^- + \text{H}^+ + 3\text{H}_2\text{O}$ | 10.0/19.1              | 21.8/21.7               |
| $\text{AnO}_2(\text{H}_2\text{O})_5^+ + (\text{HL})_2 \rightarrow \text{AnO}_2(\text{HL}_2)(\text{H}_2\text{O})_3 + \text{H}^+ + 2\text{H}_2\text{O}$                                  | 15.9/22.7              | 11.2/9.3                |
| $\text{AnO}_2(\text{H}_2\text{O})_5^+ + (\text{HL})_2 + \text{NO}_3^- \rightarrow \text{AnO}_2(\text{HL})_2(\text{NO}_3) + 5\text{H}_2\text{O}$                                        | 7.0/3.9                | -0.6/0.7                |

<sup>a</sup>.../... represent the results of  $\text{UO}_2^{n+}$  and  $\text{NpO}_2^{n+}$  ( $n=1, 2$ ) complexes, respectively. For  $\text{H}^+$ , the experimental value -263.982 kcal/mol was adopted.<sup>1</sup>

**Table S4.** The bond length and the symmetrical and antisymmetrical stretching frequency ( $\nu_s$  and  $\nu_{as}$ ,  $\text{cm}^{-1}$ ) of  $\text{An}=\text{O}_{\text{axial}}$  ( $\text{An}=\text{U}$ ,  $\text{Np}$ ) for the 2:1-type complexes.

| Species                           | $\text{U}=\text{O}_{\text{axial}}^a$ | $\nu_s^c$ | $\nu_{as}^c$ |
|-----------------------------------|--------------------------------------|-----------|--------------|
| $\text{UO}_2(\text{HL}_2)_2$      | 1.783(1.767) <sup>b</sup>            | 820       | 901          |
| $\text{NpO}_2(\text{HL}_2)_2$     | 1.759                                | 821       | 919          |
| $[\text{UO}_2(\text{HL}_2)_2]^-$  | 1.848                                | 724       | 763          |
| $[\text{NpO}_2(\text{HL}_2)_2]^-$ | 1.813                                | 742       | 798          |

<sup>a</sup> The average bond lengths. <sup>b</sup>The value in the parenthesis is the corresponding experimental data.<sup>2</sup>

<sup>c</sup>The calculated vibrational frequencies are calibrated with scaling factor 0.968 at the B3LYP/6-311G(d, p) level<sup>3</sup>.

### Complete Gaussian 09 reference (Reference 21)

M. J. Frisch, G. W. Trucks, H. B. Schlegel, G. E. Scuseria, M. A. Robb, J. R. Cheeseman, G. Scalmani, V. Barone, B. Mennucci, G. A. Petersson, H. Nakatsuji, M. Caricato, X. Li, H. P. Hratchian, A. F. Izmaylov, J. Bloino, G. Zheng, J. L. Sonnenberg, M. Hada, M. Ehara, K. Toyota, R. Fukuda, J. Hasegawa, M. Ishida, T. Nakajima, Y. Honda, O. Kitao, H. Nakai, T. Vreven, J. A. Montgomery, Jr. , J. E. Peralta, F. Ogliaro, M. Bearpark, J. J. Heyd, E. Brothers, K. N. Kudin, V. N. Staroverov, R. Kobayashi, J. Normand, K. Raghavachari, A. Rendell, J. C. Burant, S. S. Iyengar, J. Tomasi, M. Cossi, N. Rega, J. M. Millam, M. Klene, J. E. Knox, J. B. Cross, V. Bakken, C. Adamo, J. Jaramillo, R. Gomperts, R. E. Stratmann, O. Yazyev, A. J. Austin, R. Cammi, C. Pomelli, J. W. Ochterski, R. L. Martin, K. Morokuma, V. G. Zakrzewski, G. A. Voth, P. Salvador, J. J. Dannenberg, S. Dapprich, A. D. Daniels, Ö. Farkas, J. B. Foresman, J. V. Ortiz, J. Cioslowski and D. J. Fox, *Gaussian 09 Revision A.02*, Gaussian, Inc., Wallingford CT, 2009.

### Notes

Corresponding Author

\*E-mail: shiwq@ihep.ac.cn

‡These two authors contributed equally to this work.

## References

1. M. D. Tissandier, K. A. Cowen, W. Y. Feng, E. Gundlach, M. H. Cohen, A. D. Earhart, J. V. Coe and T. R. Tuttle, *J. Phys. Chem. A.*, 1998, 102, 7787-7794.
2. V. A. Cocalia, M. P. Jensen, J. D. Holbrey, S. K. Spear, D. C. Stepinski and R. D. Rogers, *Dalton Trans.*, 2005, 1966-1971.
3. M. P. Andersson and P. Uvdal, *J. Phys. Chem. A.*, 2005, 109, 2937-2941.
